# Supplementary material for: From Structure to Function: Understanding Synthetic Conditions in Relation to Magnetic Properties of Hybrid Pd/Fe-Oxide Nanoparticles
Source: MDPI journal article supplement (doi:10.3390/nano12203649), 2022-10-18
Supplement: s1 [file s1]

# From Structure to Function: Understanding Synthetic Conditions in Relation to Magnetic Properties of Hybrid Pd/Fe-Oxide Nanoparticles

Alexandra Maier <sup>1</sup>, Rogier van Oossanen <sup>2,3</sup>, Gerard C. van Rhoon <sup>2,3</sup>, Jean-Philippe Pignol <sup>4</sup>, Iulian Dugulan <sup>3</sup>, Antonia G. Denkova <sup>3</sup> and Kristina Djanashvili <sup>1,\*</sup>

<sup>1</sup> Department of Biotechnology, Delft University of Technology, Van Der Maasweg 9, 2629 HZ Delft, The Netherlands

<sup>2</sup> Department of Radiotherapy, Erasmus MC Cancer Institute, University Medical Center, 3008 AE Rotterdam, The Netherlands

<sup>3</sup> Department of Radiation Science and Technology, Delft University of Technology, Mekelweg 15, 2629 JB Delft, The Netherlands

<sup>4</sup> Department of Physics and Atmospheric Sciences, Dalhousie University, Sir James Dunn Bldg., Halifax, NS B3H 4J5, Canada

\* Correspondence: k.djanashvili@tudelft.nl; Tel.: +31-15-27-85092

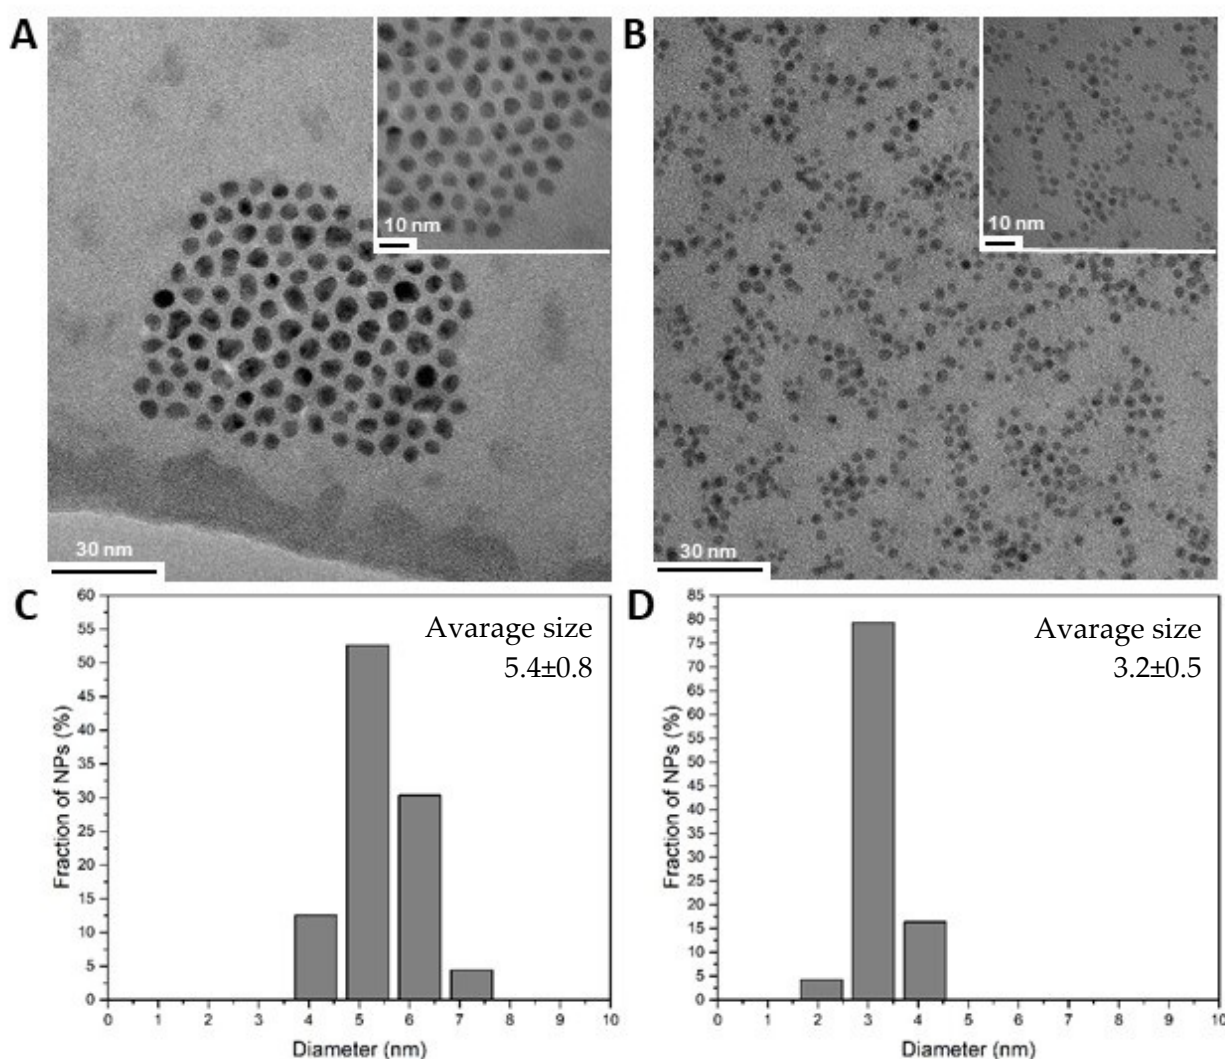

**Figure S1.** Characterization of OAm-capped (left) and nDS-capped (right) Pd-seeds: (A,B) TEM images and (C,D) size distributions.

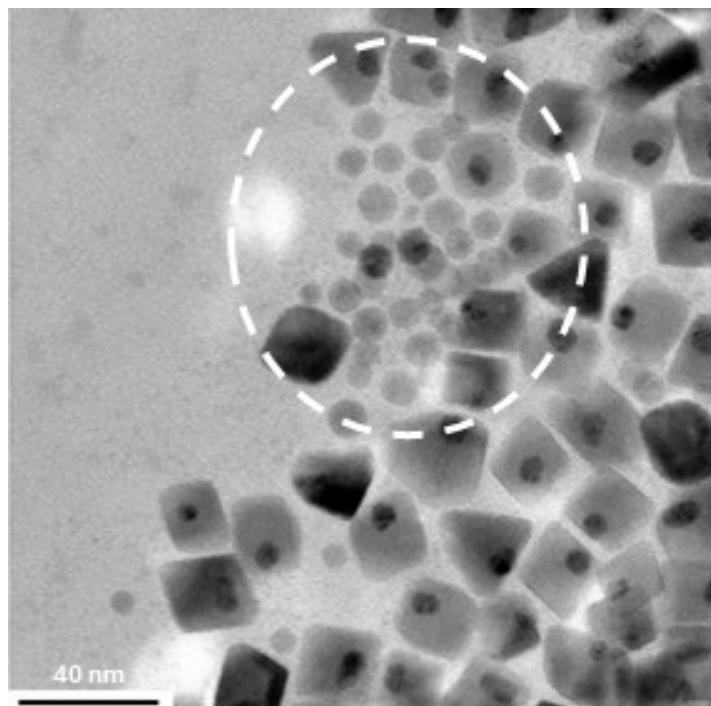

**Figure S2.** Second population of small iron oxide nanocrystals found in Exp\_10mg.

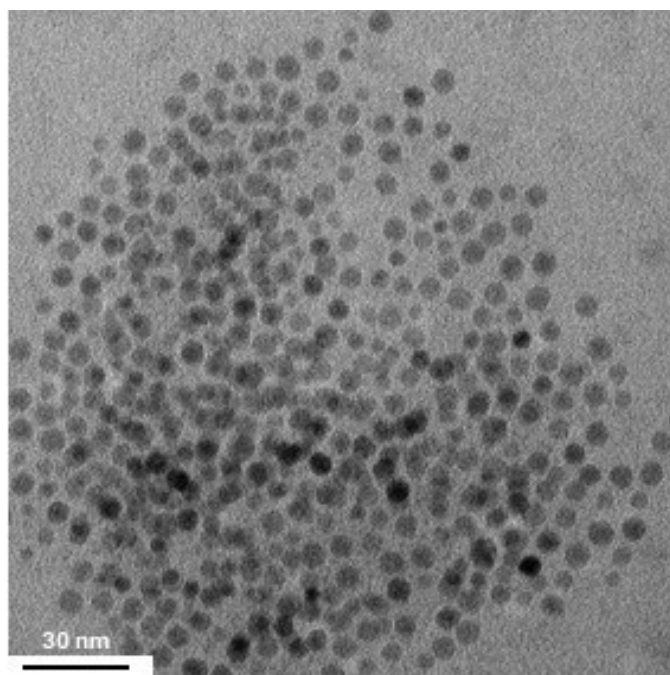

**Figure S3.** Homogeneous nucleation in the form of Fe-oxide NPs found in Exp\_7 °C.

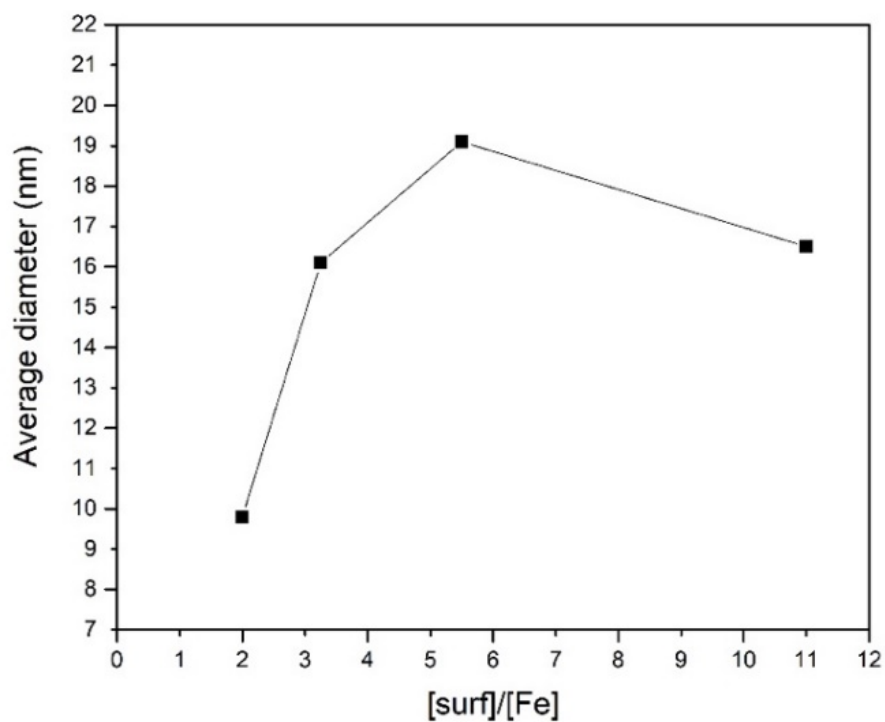

**Figure S4.** Average diameter of the Pd/Fe-oxide hybrid NPs as a function of the ligand/precursor molar ratio.

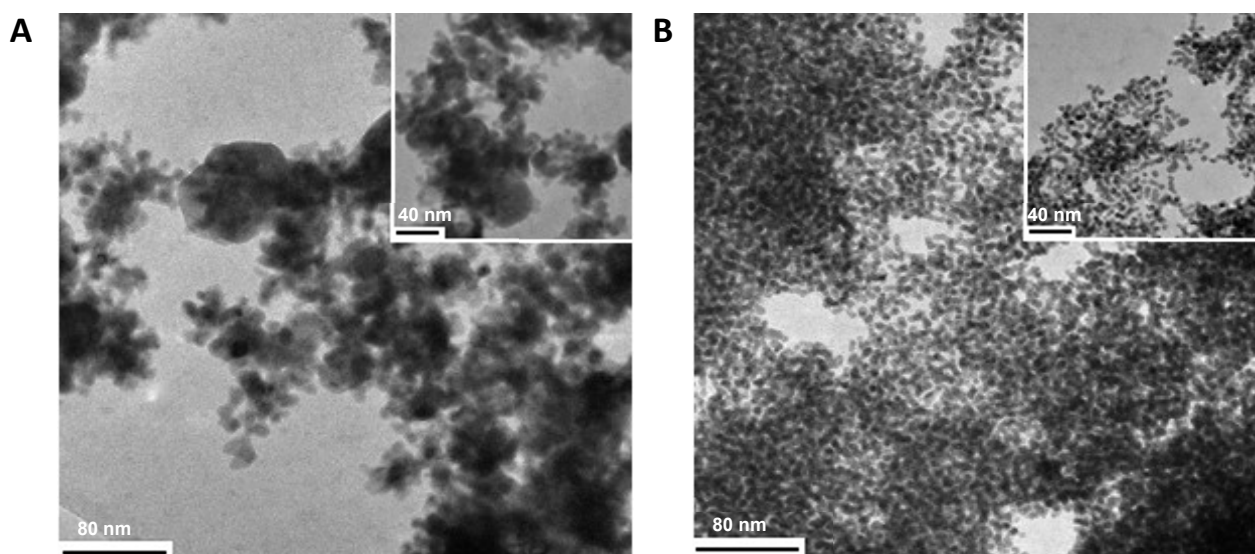

**Figure S5.** TEM images of NPs prepared with (A) only OAm (Exp\_OAm) and (B) only OA (Exp\_OA).

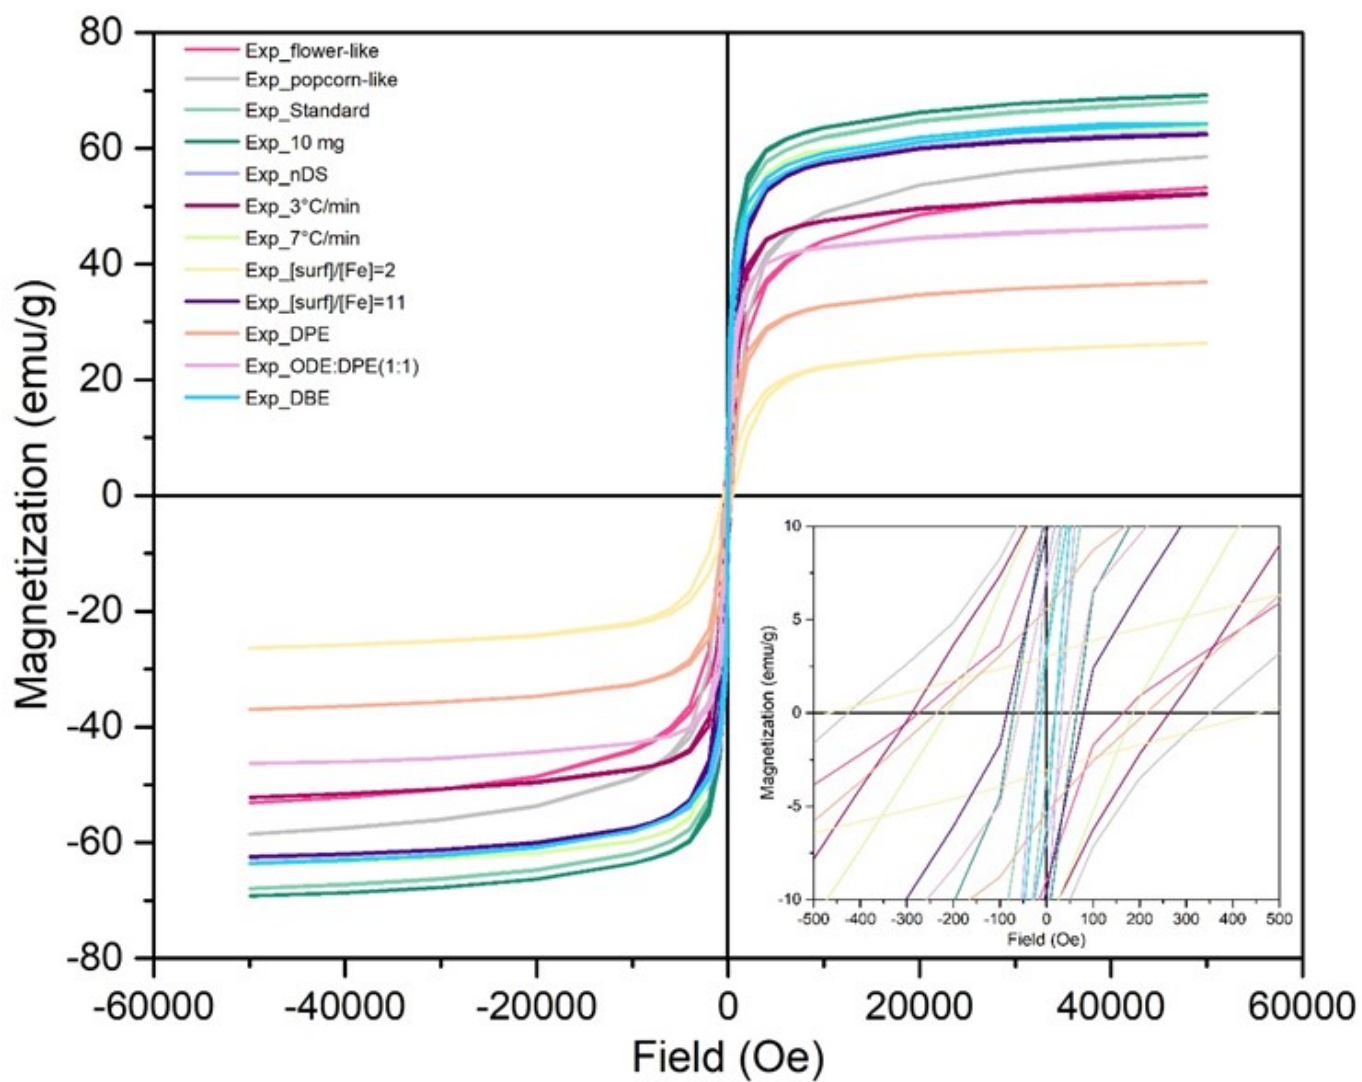

**Figure S6.** SQUID measurements at  $T = 5$  K and coercivity ( $H_c$ ) in the inset.

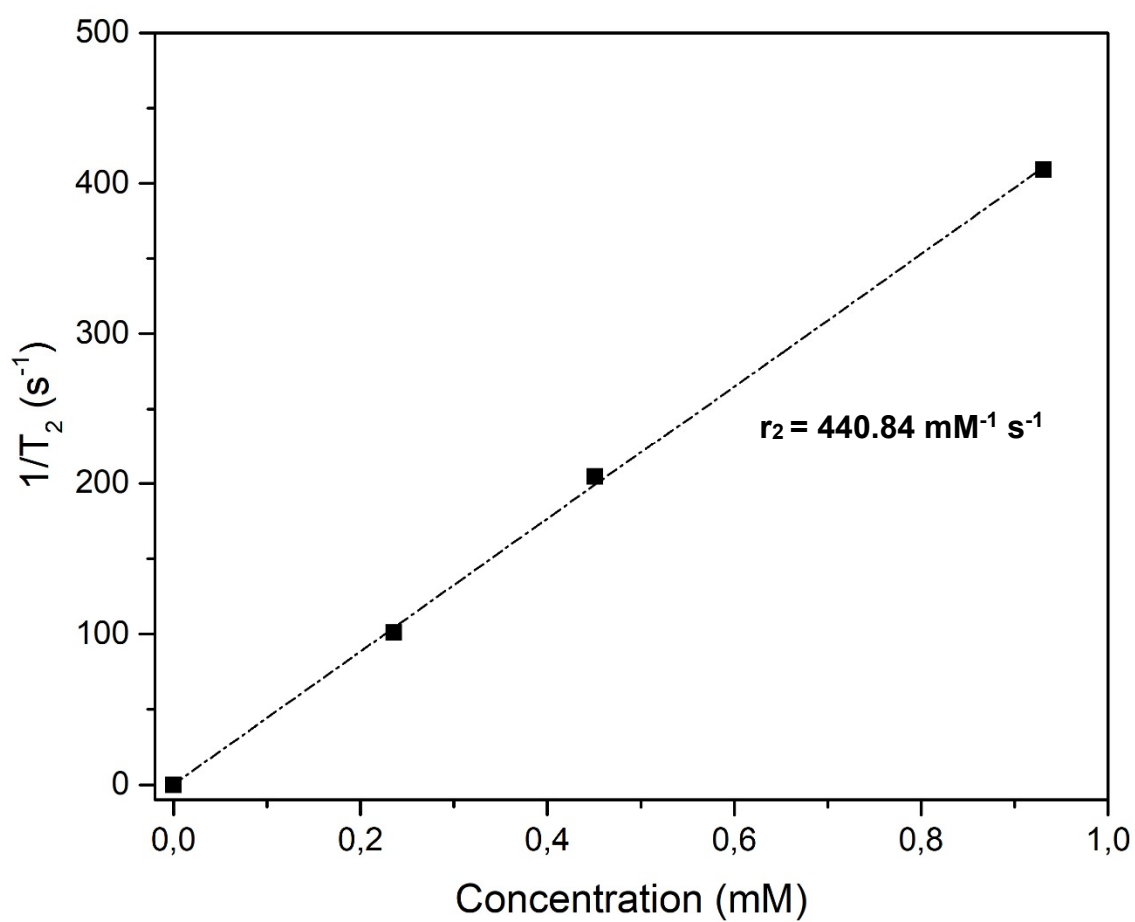

**Figure S7.** Inverse of the  $T_2$ -relaxation times as a function of iron concentration (determined by ICP-OES) for Exp\_10mg.
